# Supplementary material for: Abnormalities of the Halogen Bonds in the Complexes between Y2CTe (Y = H, F, CH3) and XF (X = F, Cl, Br, I)
Source: MDPI journal article supplement (doi:10.3390/molecules27238523), 2022-12-03
Supplement: s1 [file s1]

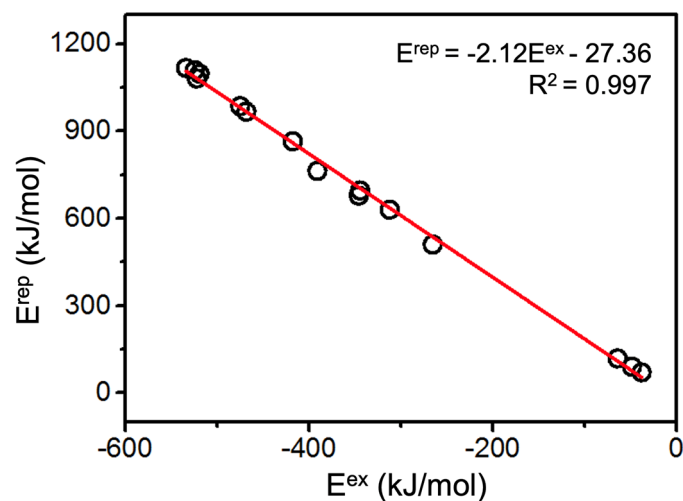

Figure S1. The relationship between repulsion energy  $E^{\text{rep}}$  and exchange energy  $E^{\text{ex}}$  in the complexes between  $\text{Y}_2\text{CTe}$  ( $\text{Y} = \text{H}, \text{F}, \text{and CH}_3$ ) and  $\text{XF}$  ( $\text{X} = \text{H}, \text{F}, \text{Cl}, \text{Br}, \text{and I}$ ).

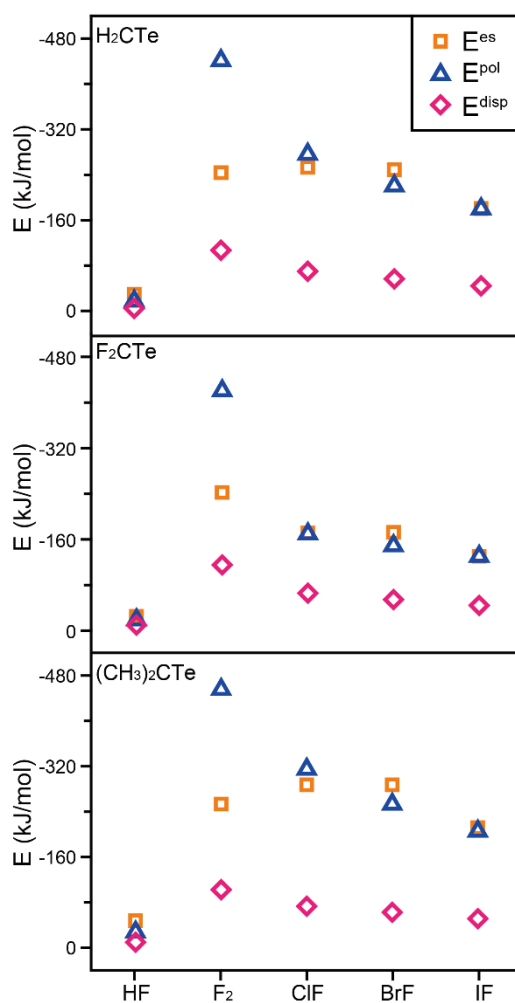

Figure S2. Electrostatic ( $E^{\text{es}}$ ), polarization ( $E^{\text{pol}}$ ), and dispersion ( $E^{\text{disp}}$ ) energies in complexes between  $\text{Y}_2\text{CTe}$  ( $\text{Y} = \text{H}, \text{F}, \text{and CH}_3$ ) and  $\text{XF}$  ( $\text{X} = \text{H}, \text{F}, \text{Cl}, \text{Br}, \text{and I}$ ).

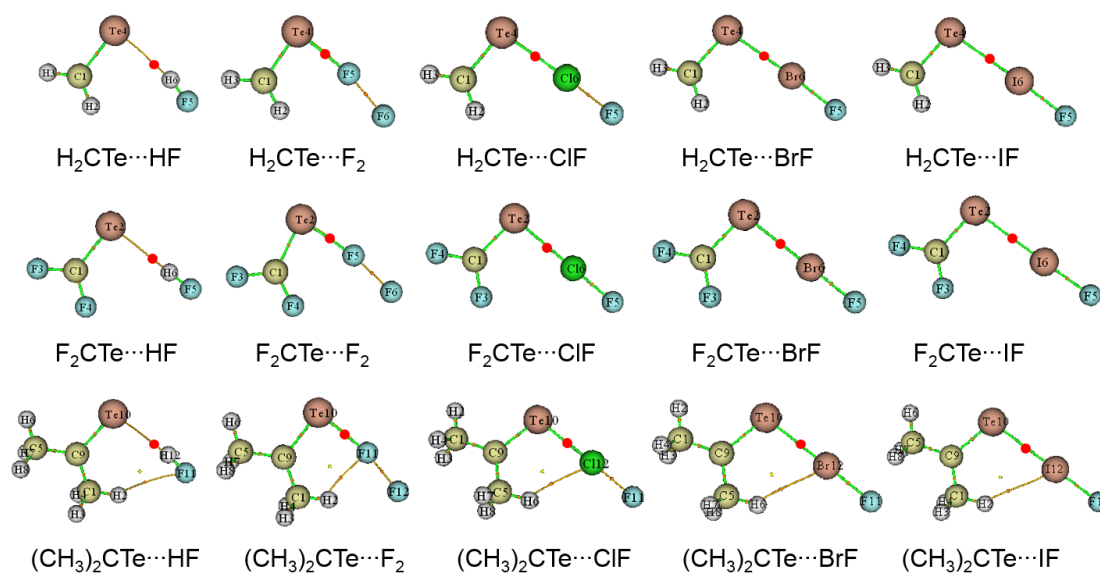

Figure S3. Molecular graphs of the complexes between  $\text{Y}_2\text{CTe}$  ( $\text{Y} = \text{H}, \text{F}, \text{CH}_3$ ) and  $\text{XF}$  ( $\text{X} = \text{H}, \text{F}, \text{Cl}, \text{Br}, \text{I}$ ). Small red balls indicate the  $\text{Te}\cdots\text{X}$  bond critical point.

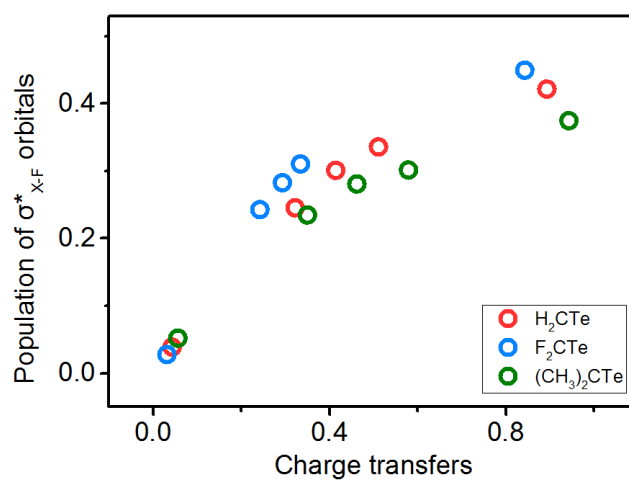

Figure S4. The relationship between the population of the  $\sigma^*_{\text{X-F}}$  orbitals and the charge transfer in the complexes formed by  $\text{Y}_2\text{CTe}$  ( $\text{Y} = \text{H}, \text{F}$ , and  $\text{CH}_3$ ) and  $\text{XF}$  ( $\text{X} = \text{H}, \text{F}, \text{Cl}, \text{Br}$ , and  $\text{I}$ ).

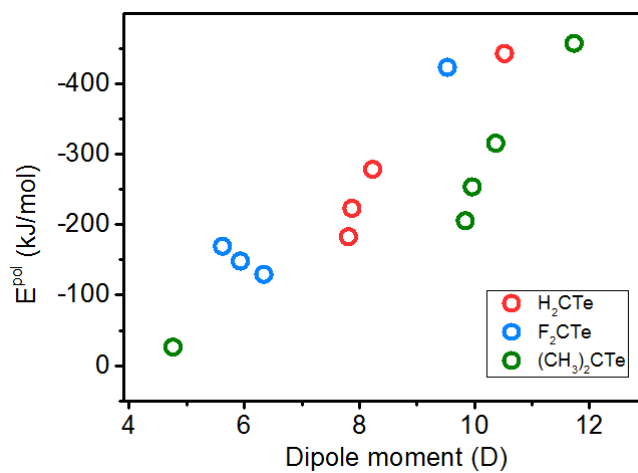

Figure S5. The relationship between the polarization energy  $E^{\text{pol}}$  and the dipole moment of the complexes formed by  $\text{Y}_2\text{CTe}$  ( $\text{Y} = \text{H}, \text{F}$ , and  $\text{CH}_3$ ) and  $\text{XF}$  ( $\text{X} = \text{F}, \text{Cl}, \text{Br}$ , and  $\text{I}$ ).

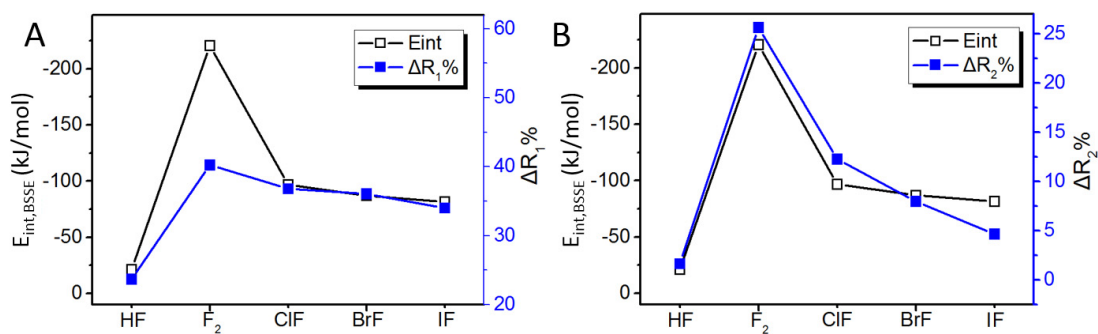

Figure S6. Trend comparison of  $E_{\text{int,BSSE}}$  with  $\Delta R_1\%$  (A) and  $\Delta R_2\%$  (B) in  $\text{H}_2\text{CTe}\cdots\text{XF}$  systems.

**The coordinates of optimized monomer Y<sub>2</sub>CTe (Y = H, F, CH<sub>3</sub>), XF (X = H, F, Cl, Br, I), and their complexes.**

**H<sub>2</sub>CTe**

|    |             |             |            |
|----|-------------|-------------|------------|
| C  | 0.00000000  | -1.66932500 | 0.00000000 |
| H  | 0.92452000  | -2.23381100 | 0.00000000 |
| H  | -0.92451100 | -2.23383600 | 0.00000000 |
| Te | 0.00000000  | 0.27853100  | 0.00000000 |

**F<sub>2</sub>CTe**

|    |             |             |            |
|----|-------------|-------------|------------|
| C  | -0.00017100 | -1.14712200 | 0.00000000 |
| Te | 0.00000000  | 0.79898600  | 0.00000000 |
| F  | -1.06263500 | -1.92596600 | 0.00000000 |
| F  | 1.06274800  | -1.92564800 | 0.00000000 |

**(CH<sub>3</sub>)<sub>2</sub>CTe**

|    |             |             |             |
|----|-------------|-------------|-------------|
| C  | 1.93856200  | -1.26029100 | -0.00000500 |
| H  | 1.31811300  | -2.15179700 | 0.00023300  |
| H  | 2.59352800  | -1.27798900 | -0.87673500 |
| H  | 2.59369100  | -1.27772700 | 0.87664400  |
| C  | 1.93856200  | 1.26029100  | -0.00000500 |
| H  | 1.31811200  | 2.15179700  | 0.00018800  |
| H  | 2.59365900  | 1.27774900  | 0.87666700  |
| H  | 2.59356100  | 1.27796800  | -0.87671100 |
| C  | 1.13007900  | 0.00000000  | -0.00004300 |
| Te | -0.82795900 | 0.00000000  | 0.00000100  |

**HF**

|   |            |            |             |
|---|------------|------------|-------------|
| F | 0.00000000 | 0.00000000 | 0.09218500  |
| H | 0.00000000 | 0.00000000 | -0.82966400 |

**F<sub>2</sub>**

|   |            |            |             |
|---|------------|------------|-------------|
| F | 0.00000000 | 0.00000000 | 0.70058100  |
| F | 0.00000000 | 0.00000000 | -0.70058100 |

**ClF**

|    |            |            |             |
|----|------------|------------|-------------|
| F  | 0.00000000 | 0.00000000 | -1.07141000 |
| Cl | 0.00000000 | 0.00000000 | 0.56721700  |

**BrF**

|    |            |            |             |
|----|------------|------------|-------------|
| F  | 0.00000000 | 0.00000000 | -1.39848000 |
| Br | 0.00000000 | 0.00000000 | 0.35960900  |

**IF**

|   |            |            |             |
|---|------------|------------|-------------|
| F | 0.00000000 | 0.00000000 | -1.64106200 |
| I | 0.00000000 | 0.00000000 | 0.27867100  |

#### H<sub>2</sub>CTe...HF

|    |             |             |             |
|----|-------------|-------------|-------------|
| C  | 0.40812600  | 1.67368900  | 0.00000100  |
| H  | -0.54068900 | 2.19616900  | 0.00002900  |
| H  | 1.31096600  | 2.27166100  | -0.00002800 |
| Te | 0.48693200  | -0.27130600 | 0.00000000  |
| F  | -2.94540300 | -0.01992700 | -0.00000400 |
| H  | -2.03088400 | -0.22270500 | 0.00002600  |

#### H<sub>2</sub>CTe...F<sub>2</sub>

|    |             |             |             |
|----|-------------|-------------|-------------|
| C  | 0.51970200  | 1.67251800  | 0.00002200  |
| H  | -0.48672200 | 2.07748600  | 0.00022600  |
| H  | 1.37653600  | 2.33277200  | -0.00015500 |
| Te | 0.71822400  | -0.24278900 | -0.00001800 |
| F  | -1.43262200 | -0.26363900 | 0.00020500  |
| F  | -3.16245400 | 0.06137700  | -0.00012500 |

#### H<sub>2</sub>CTe...ClF

|    |             |             |             |
|----|-------------|-------------|-------------|
| C  | -1.25498700 | 1.62469400  | -0.00006500 |
| H  | -0.41452400 | 2.31006100  | -0.00044800 |
| H  | -2.26293200 | 2.01928900  | 0.00060000  |
| Te | -0.91890200 | -0.28308800 | 0.00005700  |
| F  | 3.42150000  | 0.19550700  | 0.00047500  |
| Cl | 1.59981200  | -0.06567700 | -0.00041200 |

#### H<sub>2</sub>CTe...BrF

|    |             |             |             |
|----|-------------|-------------|-------------|
| C  | 1.65383900  | 1.61692300  | 0.00009200  |
| H  | 0.83845500  | 2.33141600  | -0.00054900 |
| H  | 2.67380200  | 1.97959400  | 0.00011700  |
| Te | 1.26240200  | -0.28281600 | 0.00000400  |
| F  | -3.29294600 | 0.22141800  | 0.00008800  |
| Br | -1.41267700 | -0.03711000 | -0.00003200 |

#### H<sub>2</sub>CTe...IF

|    |             |             |             |
|----|-------------|-------------|-------------|
| C  | 2.01881700  | 1.61089600  | -0.00004800 |
| H  | 1.22353500  | 2.34720300  | 0.00017000  |
| H  | 3.04781300  | 1.94746100  | 0.00009500  |
| Te | 1.58697200  | -0.28253200 | -0.00001900 |
| F  | -3.29898500 | 0.22575100  | -0.00016700 |
| I  | -1.30596000 | -0.02453100 | 0.00004800  |

#### F<sub>2</sub>CTe...HF

|    |             |             |             |
|----|-------------|-------------|-------------|
| C  | 1.08366000  | 0.73214800  | -0.00000800 |
| Te | -0.12459800 | -0.79958200 | -0.00006800 |
| F  | 2.39464000  | 0.67109600  | 0.00066800  |
| F  | 0.73141600  | 1.99450700  | -0.00066100 |
| F  | -2.88903700 | 1.37711700  | 0.00043200  |
| H  | -2.15602300 | 0.80089100  | -0.00037400 |

F<sub>2</sub>CTe...F<sub>2</sub>

|    |             |             |             |
|----|-------------|-------------|-------------|
| C  | 0.68580800  | 1.14353100  | 0.00010600  |
| Te | 0.47860400  | -0.80989200 | 0.00001200  |
| F  | 1.84938300  | 1.73902900  | -0.00019500 |
| F  | -0.26276700 | 2.01553500  | 0.00017100  |
| F  | -1.59342000 | -0.27577200 | -0.00002600 |
| F  | -3.21566600 | 0.43822900  | -0.00008800 |

F<sub>2</sub>CTe...ClF

|    |             |             |             |
|----|-------------|-------------|-------------|
| C  | 1.33414700  | 0.95989900  | -0.00001000 |
| Te | 0.53636300  | -0.82911500 | -0.00001000 |
| F  | 0.68265900  | 2.08546600  | -0.00023500 |
| F  | 2.62071700  | 1.20135800  | 0.00025300  |
| F  | -3.61192200 | 0.70552900  | 0.00022400  |
| Cl | -1.94816700 | 0.08372900  | -0.00009400 |

F<sub>2</sub>CTe...BrF

|    |             |             |             |
|----|-------------|-------------|-------------|
| C  | -1.68704400 | 0.96627900  | 0.00062800  |
| Te | -0.89839900 | -0.82677600 | -0.00008400 |
| F  | -1.03167800 | 2.09068700  | -0.00066500 |
| F  | -2.97261900 | 1.21346600  | 0.00040700  |
| F  | 3.51394400  | 0.62883100  | 0.00013200  |
| Br | 1.75006300  | 0.05136700  | 0.00004900  |

F<sub>2</sub>CTe...IF

|    |             |             |             |
|----|-------------|-------------|-------------|
| C  | -2.02087300 | 0.97456600  | 0.00010700  |
| Te | -1.23738400 | -0.82094400 | 0.00007200  |
| F  | -1.36556400 | 2.09979500  | -0.00269300 |
| F  | -3.30660300 | 1.22305500  | 0.00298500  |
| F  | 3.54311400  | 0.57406800  | 0.00425600  |
| I  | 1.63454100  | 0.03338500  | -0.00085500 |

(CH<sub>3</sub>)<sub>2</sub>CTe...HF

|   |             |            |             |
|---|-------------|------------|-------------|
| C | -0.68363000 | 2.12169900 | -0.00005900 |
| H | 0.39320300  | 2.26186800 | -0.00050600 |
| H | -1.11097000 | 2.62003100 | -0.87580900 |
| H | -1.11015900 | 2.61976100 | 0.87623500  |

|    |             |             |             |
|----|-------------|-------------|-------------|
| C  | -2.57337200 | 0.45359000  | 0.00006300  |
| H  | -2.83391000 | -0.60092200 | 0.00033700  |
| H  | -3.01824200 | 0.93473100  | 0.87639400  |
| H  | -3.01825300 | 0.93426600  | -0.87651200 |
| C  | -1.09553900 | 0.68486600  | -0.00003400 |
| Te | 0.18246200  | -0.80007500 | -0.00000600 |
| F  | 2.79696000  | 1.39584500  | 0.00005700  |
| H  | 2.15293100  | 0.71064800  | -0.00015000 |

(CH<sub>3</sub>)<sub>2</sub>CTe...F<sub>2</sub>

|    |             |             |             |
|----|-------------|-------------|-------------|
| C  | 0.00709700  | 2.15778100  | 0.00031500  |
| H  | 1.05438900  | 1.86921100  | -0.00309000 |
| H  | -0.21188300 | 2.78120700  | -0.87251500 |
| H  | -0.20652400 | 2.77505300  | 0.87897900  |
| C  | -2.38518400 | 1.32179000  | -0.00038300 |
| H  | -3.02254400 | 0.44135600  | -0.00132800 |
| H  | -2.61746300 | 1.93179600  | 0.87718700  |
| H  | -2.61697700 | 1.93361200  | -0.87670200 |
| C  | -0.92595300 | 1.00005900  | -0.00030000 |
| Te | -0.32703800 | -0.85460500 | 0.00002400  |
| F  | 1.72569500  | -0.13125500 | 0.00030200  |
| F  | 3.21332900  | 0.77897000  | -0.00047800 |

(CH<sub>3</sub>)<sub>2</sub>CTe...ClF

|    |             |             |             |
|----|-------------|-------------|-------------|
| C  | 2.92247500  | 0.87353200  | 0.00008200  |
| H  | 3.35275400  | -0.12518200 | -0.00016400 |
| H  | 3.28370800  | 1.41839500  | -0.87681900 |
| H  | 3.28353400  | 1.41784300  | 0.87740700  |
| C  | 0.76078800  | 2.19989800  | -0.00007300 |
| H  | -0.32356400 | 2.13202900  | -0.00007100 |
| H  | 1.09027500  | 2.76548500  | 0.87692300  |
| H  | 1.09032400  | 2.76548200  | -0.87703600 |
| C  | 1.42889600  | 0.87080800  | -0.00003500 |
| Te | 0.43868800  | -0.81687500 | -0.00001200 |
| F  | -3.63261700 | 0.79339600  | 0.00003800  |
| Cl | -1.91577700 | 0.07632000  | 0.00001200  |

(CH<sub>3</sub>)<sub>2</sub>CTe...BrF

|   |            |             |             |
|---|------------|-------------|-------------|
| C | 3.27124700 | 0.89441800  | -0.00000500 |
| H | 3.70841000 | -0.10122500 | -0.00038200 |
| H | 3.62881000 | 1.44210900  | -0.87672900 |
| H | 3.62870800 | 1.44131200  | 0.87728200  |
| C | 1.09925100 | 2.20323500  | -0.00000800 |
| H | 0.01569400 | 2.12093400  | -0.00026900 |

|    |             |             |             |
|----|-------------|-------------|-------------|
| H  | 1.42104200  | 2.77266600  | 0.87736100  |
| H  | 1.42153400  | 2.77285300  | -0.87707900 |
| C  | 1.77777000  | 0.87948800  | -0.00001600 |
| Te | 0.79941100  | -0.81666500 | -0.00000800 |
| F  | -3.53051000 | 0.70451400  | -0.00005700 |
| Br | -1.72881700 | 0.05184100  | 0.00002600  |

(CH<sub>3</sub>)<sub>2</sub>CTe...IF

|    |             |             |             |
|----|-------------|-------------|-------------|
| C  | 1.44947400  | 2.21367000  | 0.00006600  |
| H  | 0.36497200  | 2.13948200  | 0.00072500  |
| H  | 1.77466200  | 2.78222700  | 0.87686300  |
| H  | 1.77344700  | 2.78163300  | -0.87757300 |
| C  | 3.61290500  | 0.89578700  | -0.00005500 |
| H  | 4.04605500  | -0.10147400 | 0.00054100  |
| H  | 3.97255200  | 1.44120800  | -0.87746900 |
| H  | 3.97278300  | 1.44248900  | 0.87644400  |
| C  | 2.11895600  | 0.88530300  | 0.00005000  |
| Te | 1.13887600  | -0.81134900 | 0.00001800  |
| F  | -3.55773600 | 0.63235600  | 0.00004500  |
| I  | -1.62631000 | 0.03858100  | -0.00002300 |
